# Supplementary material for: Ultrathin bismuth nanosheets as an efficient polysulfide catalyst for high performance lithium–sulfur batteries
Source: Royal Society of Chemistry journal article supplement (doi:10.1039/c9ta11079h), 2019-11-14
Supplement: c9ta11079h1.pdf [file c9ta11079h1.pdf]

## Supporting Information

### **Ultrathin Bismuth Nanosheets as Efficient Polysulfide Catalyst for High Performance Lithium-Sulfur Battery**

Hongfei Xu, Shubin Yang, Bin Li\*

Key Laboratory of Aerospace Advanced Materials and Performance of Ministry of Education, School of Materials Science & Engineering

Beihang University  
Beijing, 100191, China

\*E-mail: [li\\_bin@buaa.edu.cn](mailto:li_bin@buaa.edu.cn)

### **Supporting Figures**

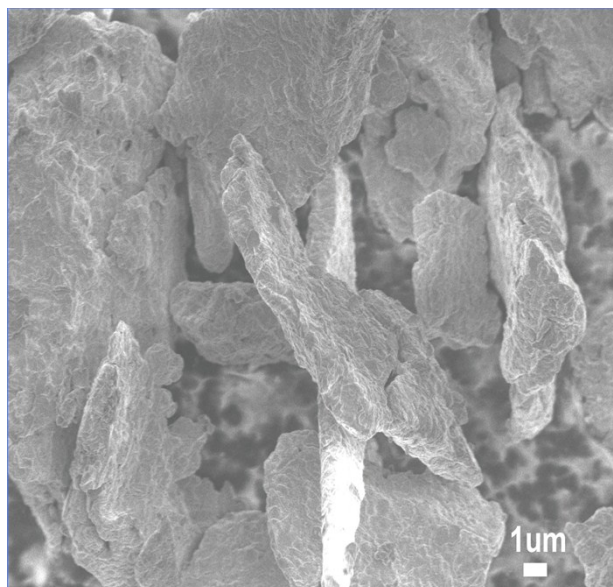

**Figure S1.** SEM image of commercial Bi bulk

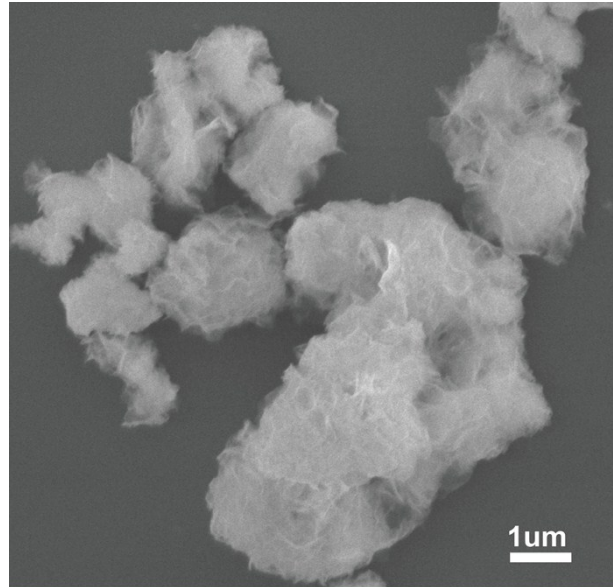

**Figure S2.** SEM image of BiOC

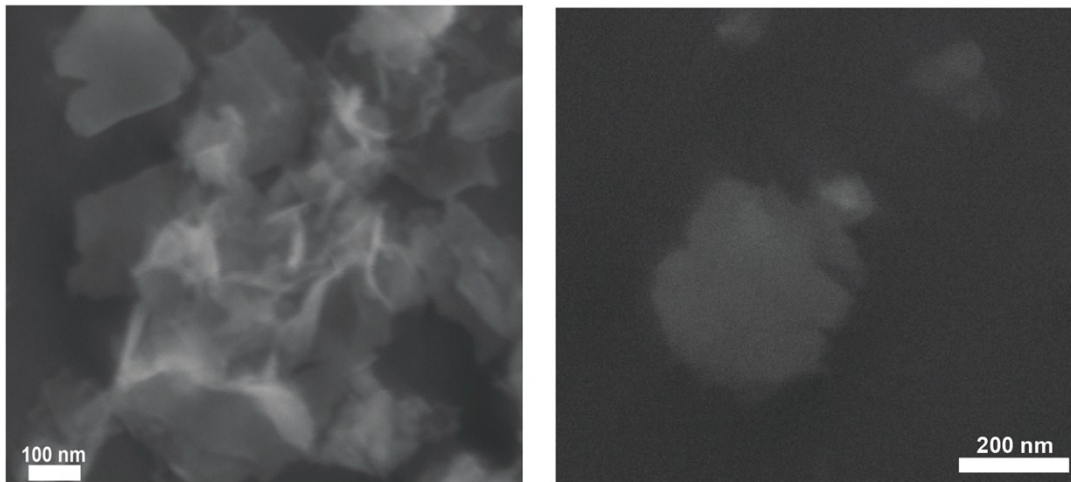

**Figure S3.** Dispersive 2D-Bi nanosheets under SEM.

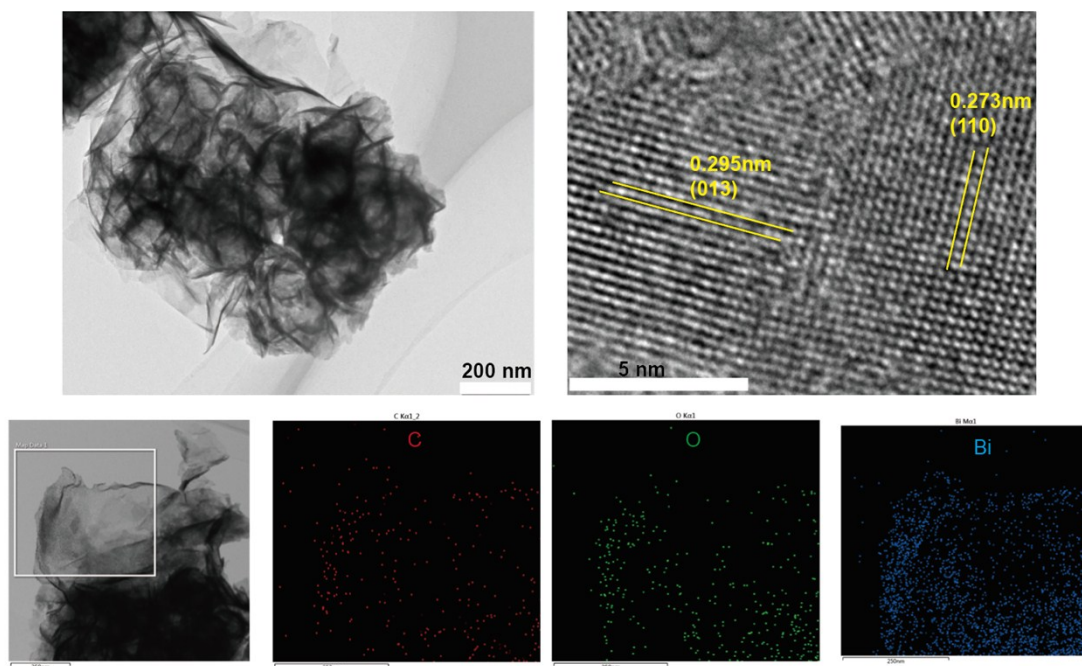

**Figure S4.** HRTEM image and corresponding elements distribution of BiOC.

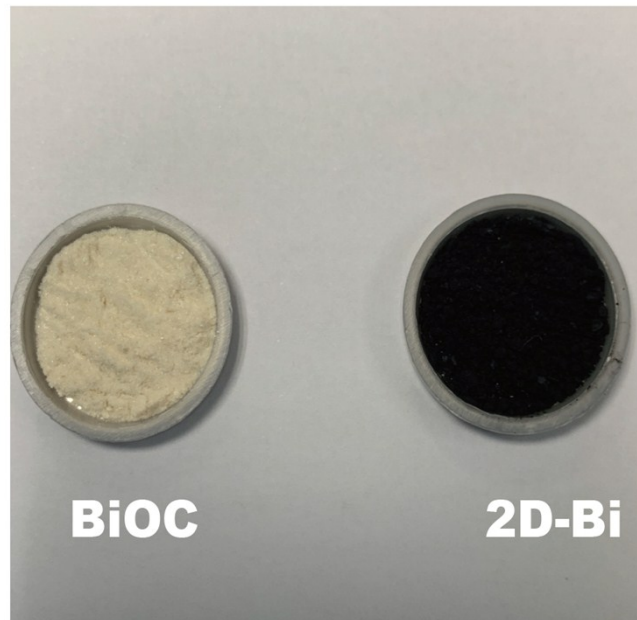

**Figure S5.** Photograph of BiOC and reduced 2D-Bi

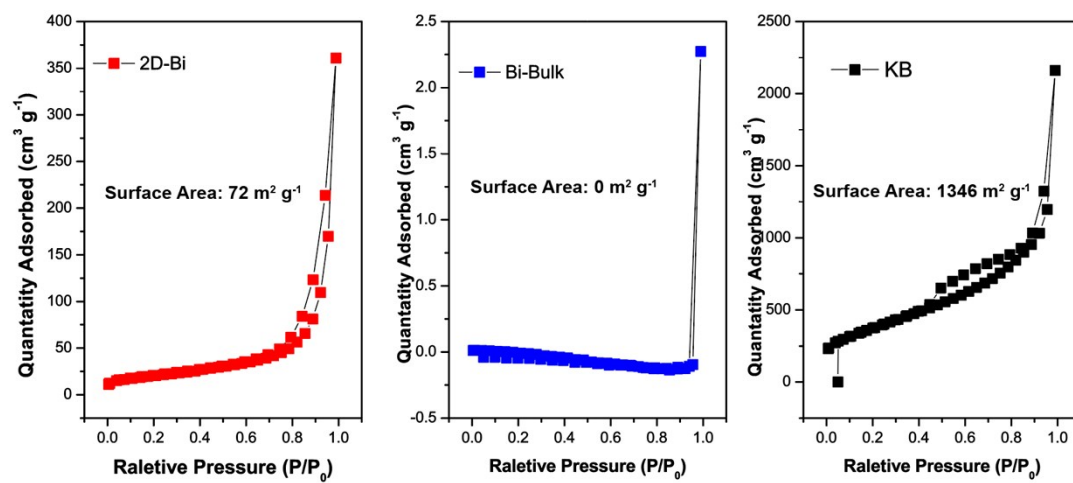

**Figure S6.**  $N_2$  adsorption/desorption isotherm at 77K of 2D-Bi, Bi bulk, and KB.

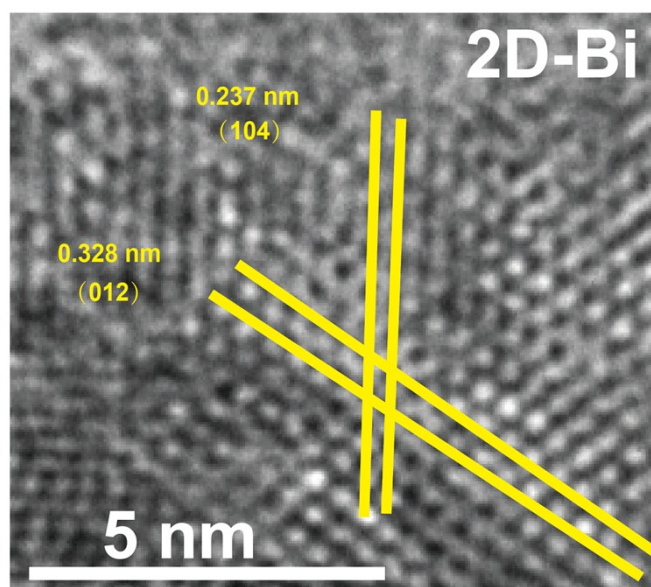

**Figure S7.** HRTEM image of a selected area in panel.

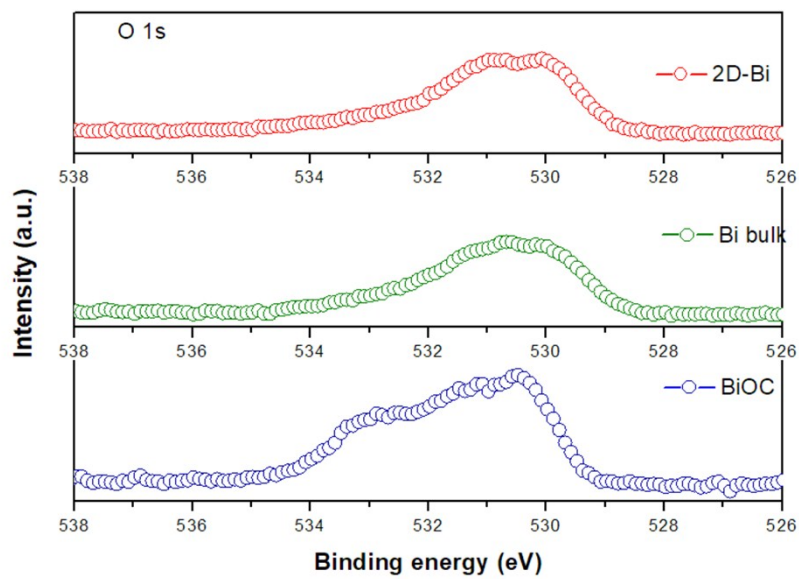

**Figure S8.** XPS spectra of O 1s for 2D-Bi, Bi bulk and BiOC. The peak at 531 eV could be ascribed to the adsorbed oxygen.

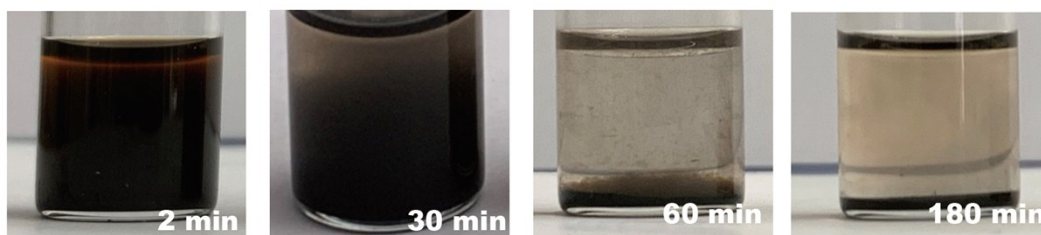

**Figure S9.** Photograph showing the adsorption ability of 2D-Bi in  $\text{Li}_2\text{S}_6$  solution with increased concentration.

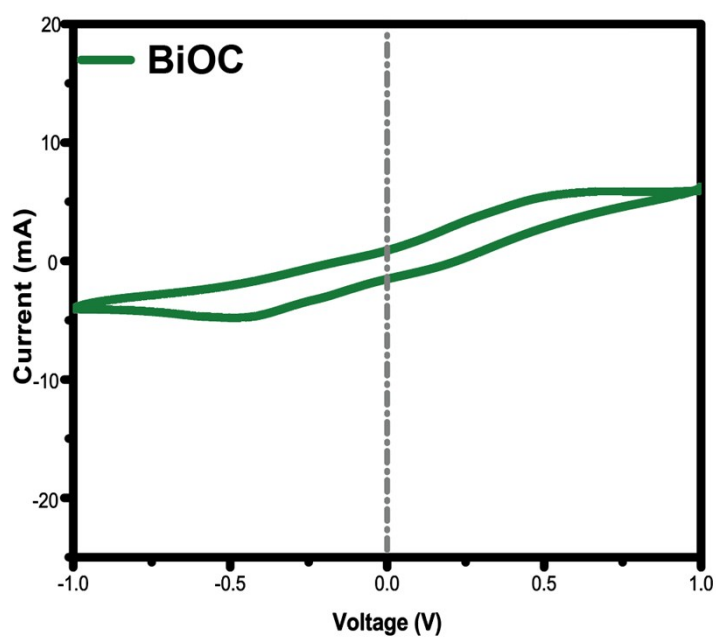

**Figure S10.** Cyclic voltammograms of the symmetric cell (BiOC as the working and counter electrodes,  $\text{Li}_2\text{S}_6$  was added as the active material).

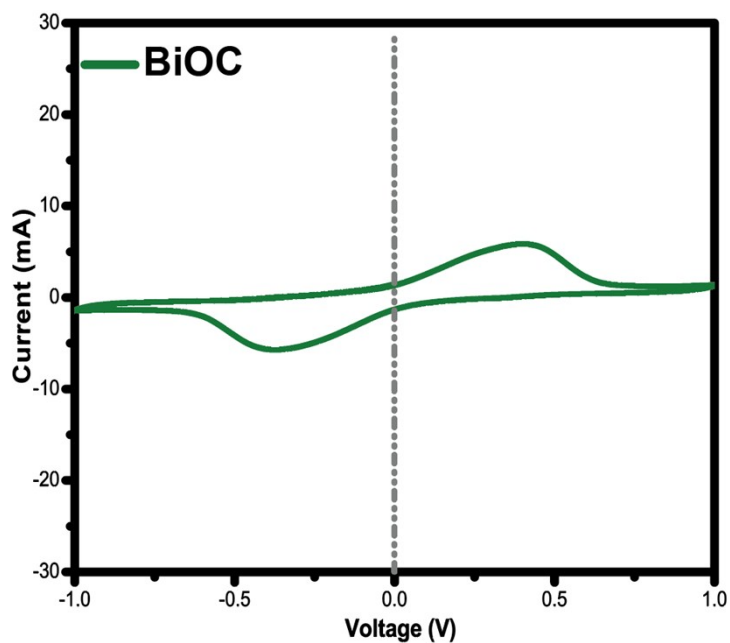

**Figure S11.** Cyclic voltammograms of the asymmetric cell (BiOC as the working and  $\text{Li}_2\text{S}/\text{BiOC}$  as the counter electrodes,  $\text{Li}_2\text{S}_6$  was added at the working electrode part).

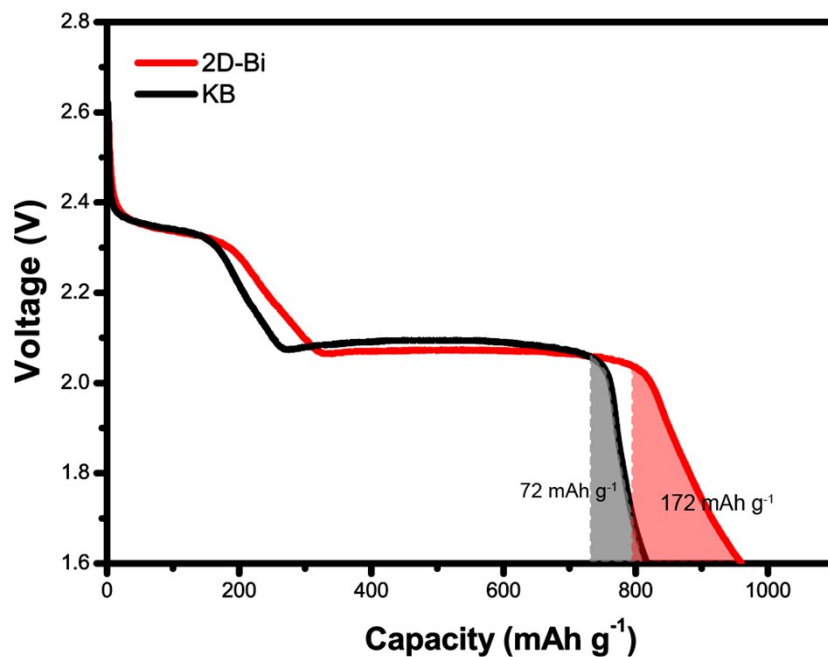

**Figure S12.** Galvanostatic discharge profiles of Li-S cells with 2D-Bi and KB modified separators. The shadowed part shows the capacity contribution from 2.0 to 1.6 V.

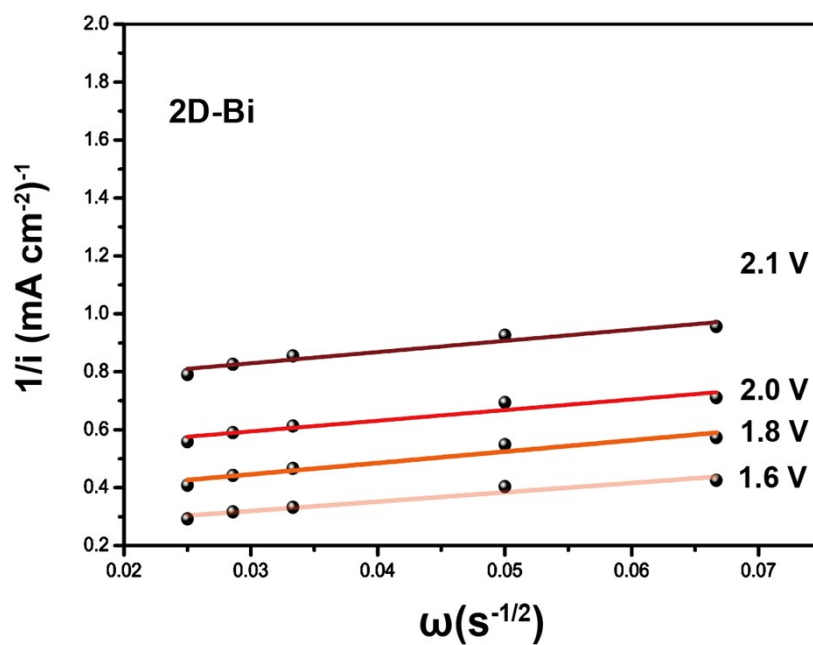

**Figure S13.** Levich-Koutecky plots derived from the negative-going scan from 2.3 to 1.5V on 2D-Bi electrode.

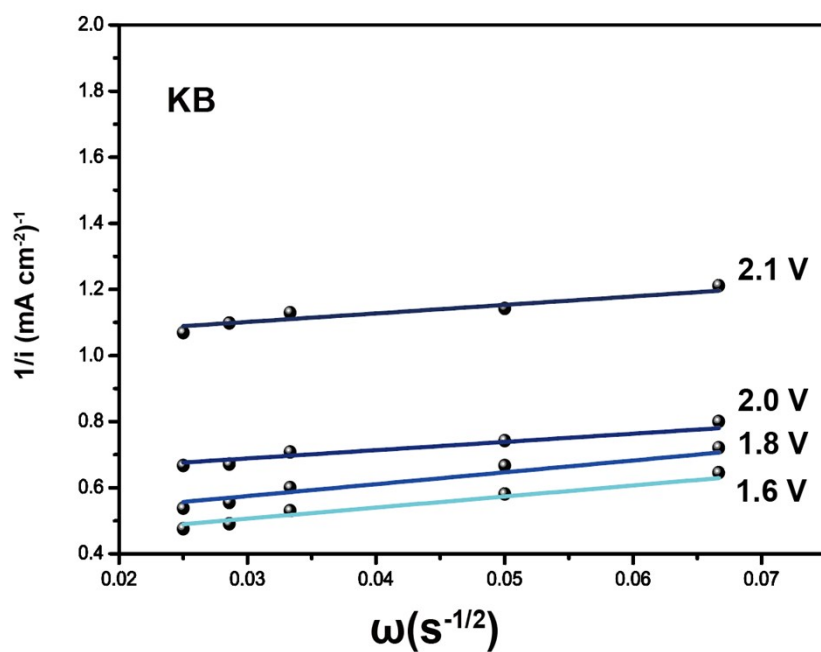

**Figure S14.** Levich–Koutecky plots derived from the negative-going scan from 2.3 to 1.5V on KB electrode.

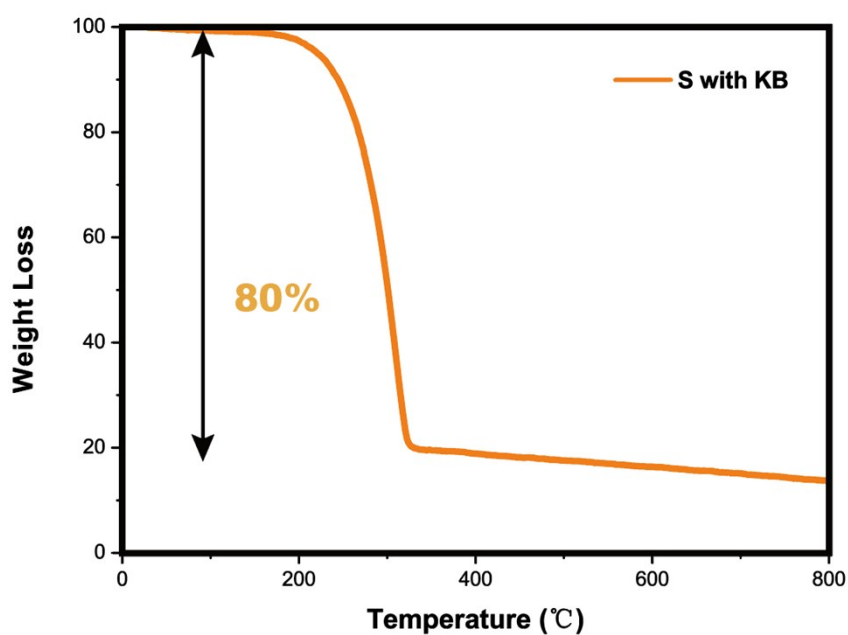

**Figure S15.** TGA curves of S and KB mixture which was directly used as cathode.



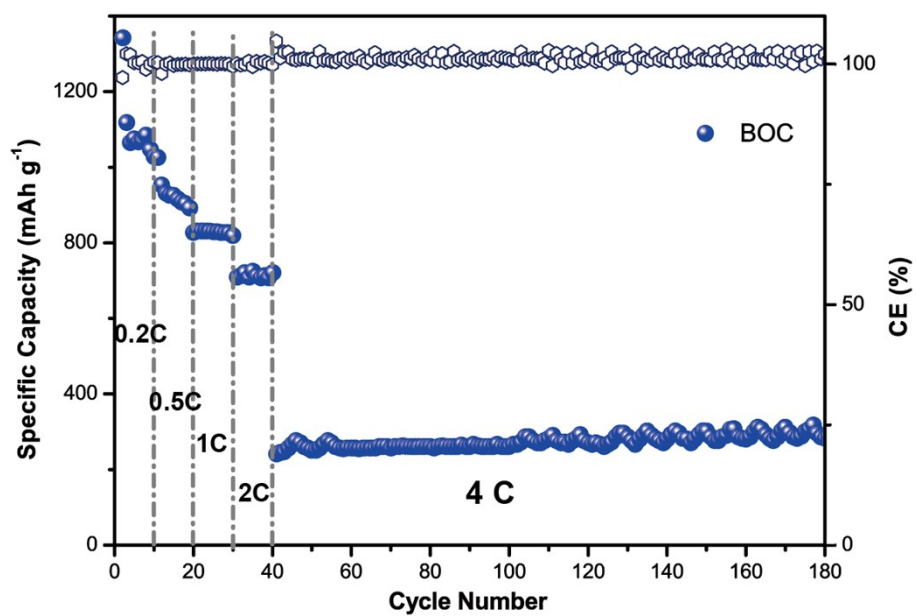

Figure S16. Rate cycling performance of BiOC.

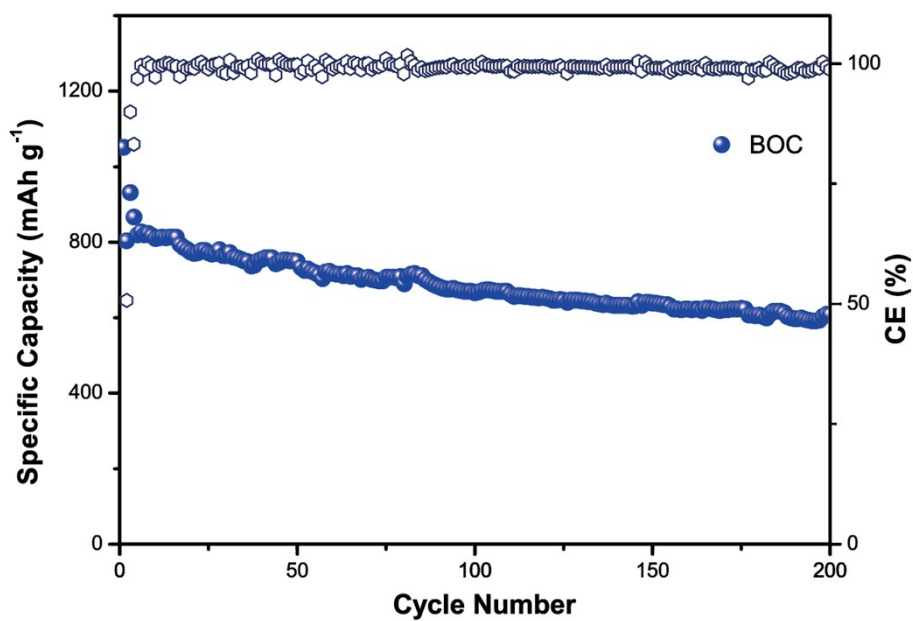

Figure S17. Cycling performance of BiOC at 0.5 C (S mass loading is ~1.5 mg).

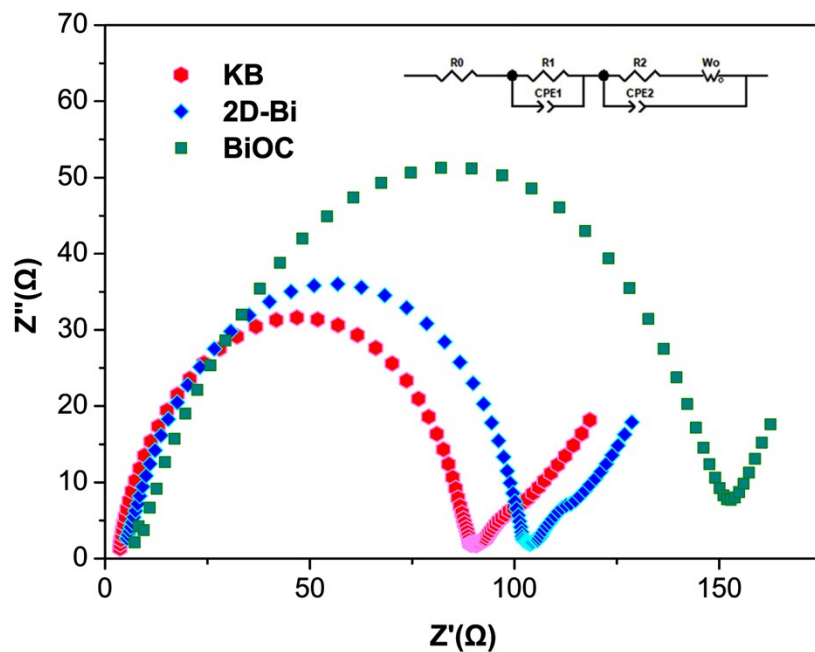

**Figure S18.** EIS spectra of KB, 2D-Bi and BiOC with KB.

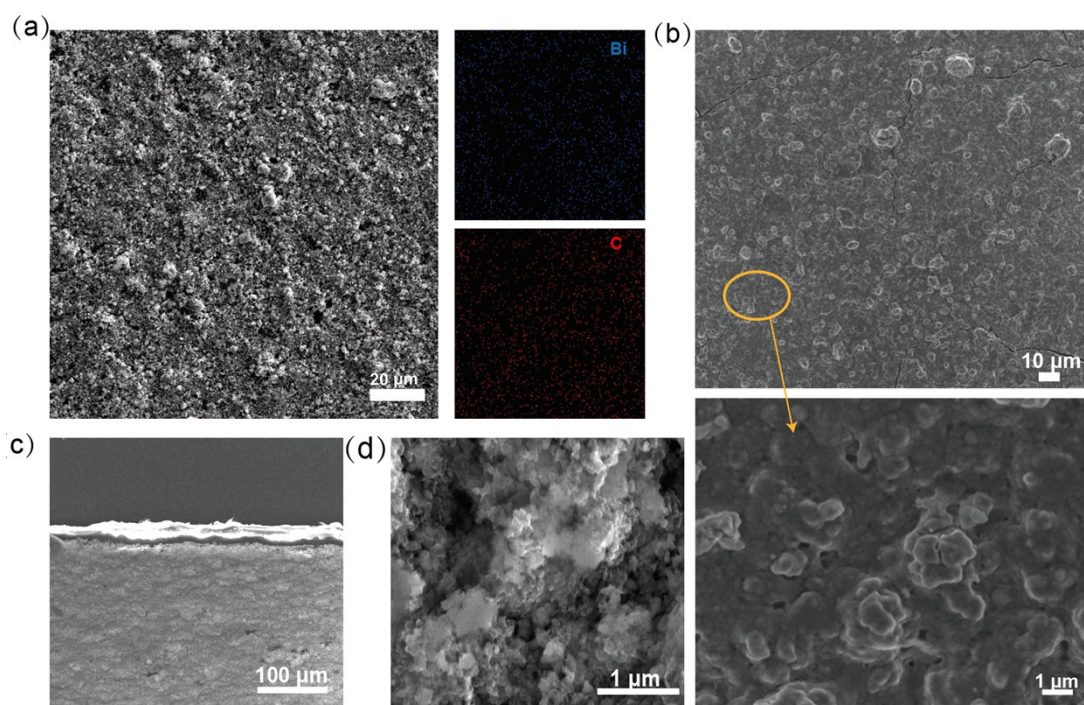

**Figure S19.** SEM images of modified separator after 200 cycles a, b) Top view of 2D-Bi modified separator with corresponding elemental mapping. c, d) Side view of 2D-Bi modified separator

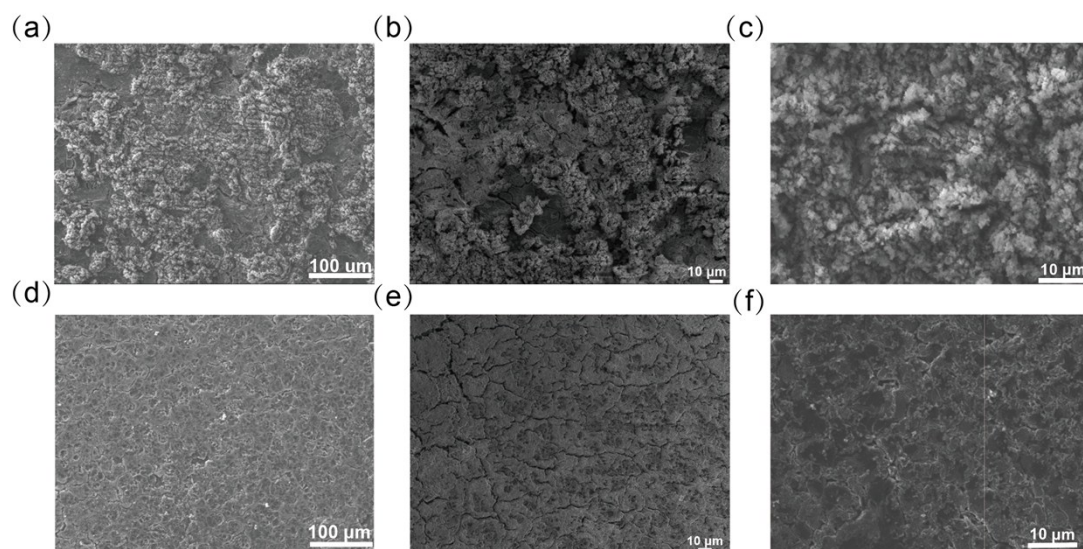

**Figure S20.** SEM images of Li anode after 100 cycles at 4 C. a, b, c) Li anode separated from normal Li-S cell. d, e, f) Li anode separated from 2D-Bi modified Li-S cell.

**Table S1.** The slopes of KB and 2D-Bi derived from the fitted Levich–Koutecky plots.

| Slop         | KB      | 2D-Bi   |
|--------------|---------|---------|
| Slop at 2.1V | 2.57501 | 1.63329 |
| Slop at 2.0V | 2.50721 | 1.91772 |
| Slop at 1.9V | 3.15084 | 2.28293 |
| Slop at 1.8V | 3.58824 | 2.04357 |
| Slop at 1.7V | 3.37147 | 1.79006 |
| Slop at 1.6V | 3.33799 | 1.80209 |

**Table S2.** The intercepts of KB and 2D-Bi derived from the fitted Levich–Koutecky plots.

| Intercept         | KB      | 2D-Bi   |
|-------------------|---------|---------|
| Intercept at 2.1V | 1.02426 | 0.79533 |
| Intercept at 2.0V | 0.66667 | 0.5484  |
| Intercept at 1.9V | 0.51773 | 0.47152 |
| Intercept at 1.8V | 0.53763 | 0.3972  |
| Intercept at 1.7V | 0.45074 | 0.32557 |
| Intercept at 1.6V | 0.40624 | 0.27504 |

**Table S3.** Comparison of electrochemical performance of this work with previous excellent works involving new Catalysts in Li-S batteries.

| Catalyst                          | Sulfur content (%) & loading (mg cm <sup>-2</sup> ) | Rate (1C=1675 mAh g <sup>-1</sup> ) | Cycle number | Capacity retention (mAh g <sup>-1</sup> %) | Reference        |
|-----------------------------------|-----------------------------------------------------|-------------------------------------|--------------|--------------------------------------------|------------------|
| <b>2D-Bi</b>                      | <b>80% &amp; 1.5</b>                                | <b>0.5C</b>                         | <b>200</b>   | <b>853-78.1%</b>                           | <b>This work</b> |
| MoS <sub>2</sub>                  | 65% & N/A                                           | 0.5C                                | 600          | 401-49.6%                                  | [1]              |
| Ti <sub>3</sub> C <sub>2</sub>    | 49% & 0.7-1                                         | 0.5C                                | 50           | 899-68%                                    | [2]              |
| Nb <sub>2</sub> O <sub>5</sub>    | 60% & 1.5                                           | 0.5C                                | 200          | 913-70%                                    | [3]              |
| S <sub>6</sub> <sup>2-</sup> -VPP | 87% & 1                                             | 0.2C                                | 300          | 840-75.3%                                  | [4]              |
| ZnS                               | 70% & 1.4                                           | 0.2C                                | 200          | 896-75%                                    | [5]              |
| SWCN                              | 80% & 3                                             | 0.2C                                | 300          | 501-44%                                    | [6]              |
| HEMO-1                            | 50% & 1.2                                           | 0.1C                                | 200          | 664-55%                                    | [7]              |
| SnO <sub>2</sub>                  | 55% & 2.8                                           | 1C                                  | 200          | 734-74%                                    | [8]              |

**Table S4.** Comparison of high rate electrochemical performance of this work with previous excellent works involving new Catalysts in Li-S batteries.

| Catalyst     | 0.2C (mAh g <sup>-1</sup> ) | 0.5C (mAh g <sup>-1</sup> ) | 1C (mAh g <sup>-1</sup> ) | 2C (mAh g <sup>-1</sup> ) | 4C or 5C (mAh g <sup>-1</sup> ) | Cycling Performance at high rate                     | Reference        |
|--------------|-----------------------------|-----------------------------|---------------------------|---------------------------|---------------------------------|------------------------------------------------------|------------------|
| <b>2D-Bi</b> | <b>1305</b>                 | <b>1090</b>                 | <b>930</b>                | <b>830</b>                | <b>710</b>                      | <b>65% (500 cycles, 408 mAh g<sup>-1</sup>, 10C)</b> | <b>This work</b> |
| HNO          | N/A                         | N/A                         | 790                       | 731                       | 685(5C)                         | 85% (250 cycles, 5C)                                 | [9]              |
| FeP          | 1105                        | 910                         | 594                       | N/A                       | 400                             | 71% (200 cycles, 1C)                                 | [10]             |

|                      |      |      |      |          |         |                                                  |      |
|----------------------|------|------|------|----------|---------|--------------------------------------------------|------|
| Co/N-PCNS            | 1203 | 871  | 777  | 683      | 549(5C) | 86% (411 mAh g <sup>-1</sup> , 400 cycles, 5C)   | [11] |
| Co-Fe-P              | 1118 | 1012 | 863  | 741      | N/A     | 71.8% (620 mAh g <sup>-1</sup> , 500 cycles, 1C) | [12] |
| Co/mSiO <sub>2</sub> | 1193 | 1075 | 1012 | 915      | 552(5C) | 77% (774 mAh g <sup>-1</sup> , 250 cycles, 1C)   | [13] |
| VN                   | 1280 | 1043 | 899  | 760      | N/A     | 41.7% (400 mAh g <sup>-1</sup> , 400 cycles, 1C) | [14] |
| S/N-CNTs/Co-NFs      | 1140 | 986  | 847  | 684 (3C) | N/A     | 60.8% (623 mAh g <sup>-1</sup> , 500 cycles, 1C) | [15] |
| MoSe@rGO             | 1275 | 1123 | 988  | 863      | n/a     | 49.7% (672 mAh g <sup>-1</sup> , 500 cycles, 2C) | [16] |

## REFERENCES

- [1] Z. A. Ghazi, X. He, A. M. Khattak, N. A. Khan, B. Liang, A. Iqbal, J. Wang, H. Sin, L. Li, Z. Tang, *Adv. Mater.* **2017**, 29, 1606817.
- [2] Y. Dong, S. Zheng, J. Qin, X. Zhao, H. Shi, X. Wang, J. Chen, Z.-S. Wu, *ACS nano* **2018**, 12, 2381.
- [3] Y. Tao, Y. Wei, Y. Liu, J. Wang, W. Qiao, L. Ling, D. Long, *Energy & Environ. Sci* **2016**, 9, 3230.
- [4] Y. He, Y. Qiao, Z. Chang, X. Cao, M. Jia, P. He, H. Zhou, *Angew. Chem., Int. Ed.* **2019**, 131, 11900.
- [5] J. Xu, W. Zhang, H. Fan, F. Cheng, D. Su, G. Wang, *Nano Energy* **2018**, 51, 73.
- [6] C. H. Chang, S. H. Chung, A. Manthiram, *Small* **2016**, 12, 174.
- [7] Y. Zheng, Y. Yi, M. Fan, H. Liu, X. Li, R. Zhang, M. Li, Z.-A. Qiao, *Energy Storage Materials* **2019**, DOI: 10.1016/j.ensm.2019.02.030.

- [8] N. Hu, X. Lv, Y. Dai, L. Fan, D. Xiong, X. Li, *ACS Appl. Mater. & Inter.* **2018**, 10, 18665.
- [9] L. Xu, H. Zhao, M. Sun, B. Huang, J. Wang, J. Xia, N. Li, D. Yin, M. Luo, F. Luo, *Angew. Chem., Int. Ed.* **2019**, 58, 11491.
- [10] J. Shen, X. Xu, J. Liu, Z. Liu, F. Li, R. Hu, J. Liu, X. Hou, Y. Feng, Y. Yu, *ACS nano*, **2019**, 13, 8986.
- [11] S. Liu, J. Li, X. Yan, Q. Su, Y. Lu, J. Qiu, Z. Wang, X. Lin, J. Huang, R. Liu, *Adv. Mater.* **2018**, 30, 1706895.
- [12] Y. Chen, W. Zhang, D. Zhou, H. Tian, D. Su, C. Wang, D. Stockdale, F. Kang, B. Li, G. Wang, *ACS nano* **2019**, 13, 4731.
- [13] D. Fang, Y. Wang, X. Liu, J. Yu, C. Qian, S. Chen, X. Wang, S. Zhang, *ACS nano* **2019**, 13, 1563.
- [14] Y. Song, S. Zhao, Y. Chen, J. Cai, J. Li, Q. Yang, J. Sun, Z. Liu, *ACS Appl. Mater. & Inter.* **2019**, 11, 5687.
- [15] L. Ma, H. Lin, W. Zhang, P. Zhao, G. Zhu, Y. Hu, R. Chen, Z. Tie, J. Liu, Z. J. N. I. Jin, *Nano Lett.* **2018**, 18, 7949.
- [16] W. Tian, B. Xi, Z. Feng, H. Li, J. Feng, S. Xiong, *Adv. Energy. Mater.* **2019**, DOI: 10.1002/aenm.201901896.
